# Supplementary material
Source: PubMed Central journal article supplement (PMC1600681)
Supplement: neo0804_0319SD1.pdf [file neo0804_0319SD1.pdf]

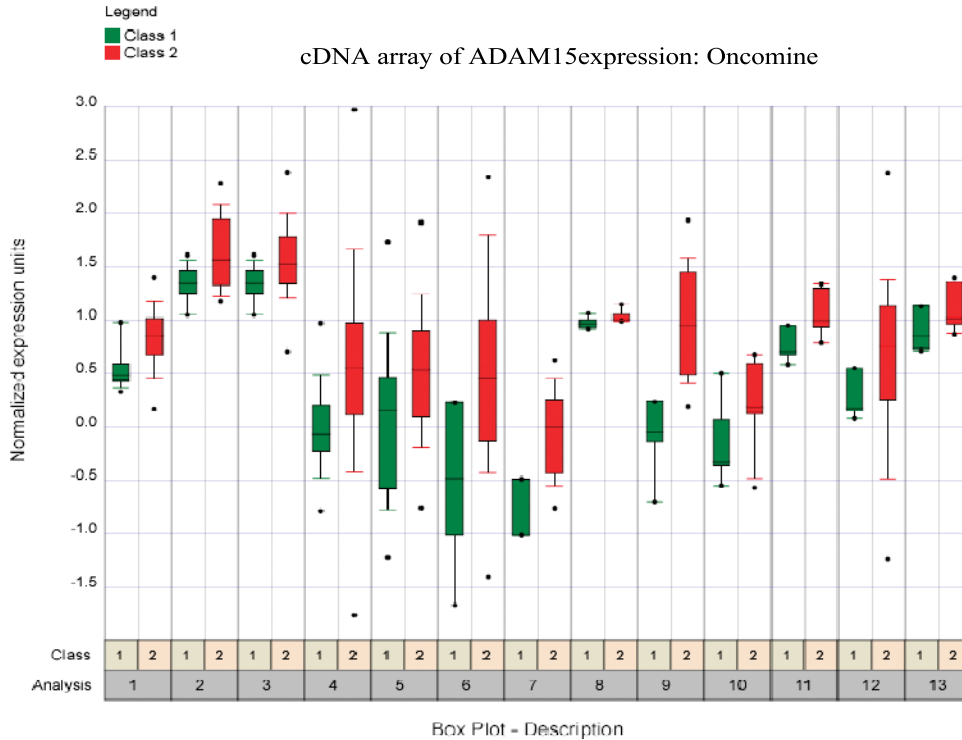

Cutoff is significant p-value for all **upregulated** cancers

**ADAM15 cDNA is upregulated in many cancer arrays**  
**Class 1 (normal) vs. Class 2 (cancer).**

Figure W1.

Table W1. Details of the ADAM15 cDNA Cancer Array Oncomine Data.

| Study Name                | Tissue Type                                                         | Class 1 (C1)                                          | Class 2 (C2) | Mean 1 | Mean 2 | T-Stat | P value | Adj.Pvalue |
|---------------------------|---------------------------------------------------------------------|-------------------------------------------------------|--------------|--------|--------|--------|---------|------------|
| 1 Beer_Lung               | Tissue Type: Non-neoplastic Lung (10)                               | Tissue Type: Lung Adenocarcinoma (86)                 | Details      | 0.511  | 0.839  | -5.14  | 1.50E04 | 0.009      |
| 2 Bhattacharjee_Lung      | Tissue Type: Normal Lung (17)                                       | Tissue Type: Carcinoid (20)                           | Details      | 1.322  | 1.597  | -3.305 | 0.003   | 0.144      |
| 3 Bhattacharjee_Lung      | Tissue Type: Normal Lung (17)                                       | Tissue Type: Lung Adenocarcinoma (139)                | Details      | 1.322  | 1.566  | -5.184 | 1.10E05 | 6.20E04    |
| 4 Chen_Liver              | Tissue Type: Non-tumor Liver (76)                                   | Tissue Type: Hepatocellular Carcinoma (104)           | Details      | -0.025 | 0.555  | -6.449 | 1.40E09 | 8.00E08    |
| 5 Dhanasekaran_Prostate   | Tissue Type: Benign Prostatic Hyperplasia (16), Normal Prostate (6) | Tissue Type: Primary Prostate Cancer (59)             | Details      | 0.019  | 0.489  | -2.796 | 0.009   | 0.489      |
| 6 Garber_Lung             | Tissue Type: Normal Lung (6)                                        | Tissue Type: Lung Adenocarcinoma (40)                 | Details      | -0.604 | 0.469  | -3.466 | 0.009   | 0.514      |
| 7 Higgins_Renal           | Tissue Type: Normal Kidney (3)                                      | Tissue Type: Clear Renal Cell Carcinoma (26)          | Details      | -0.73  | -0.071 | -3.823 | 0.03    | >1         |
| 8 Huang_Thyroid           | Tissue Type: Normal Thyroid (8)                                     | Tissue Type: Thyroid Carcinoma (8)                    | Details      | 0.964  | 1.023  | -2.26  | 0.04    | >1         |
| 9 Iacobuzio_Pancreas_II   | Tissue Type: Normal Pancreas (5)                                    | Tissue Type: Pancreatic Adenocarcinoma (12)           | Details      | -0.145 | 0.969  | -5.094 | 2.90E04 | 0.016      |
| 10 Luo_Prostate           | Tissue Type: Benign Prostatic Hyperplasia (9)                       | Tissue Type: Prostate Cancer (16)                     | Details      | -0.22  | 0.177  | -2.766 | 0.012   | 0.682      |
| 11 Magee_Prostate         | Tissue Type: Benign Prostate (4)                                    | Tissue Type: Prostate Cancer (8)                      | Details      | 0.731  | 1.026  | -2.83  | 0.023   | >1         |
| 12 Perou_Breast           | Tissue Type: Fibroadenoma (1), Normal Breast (3)                    | Tissue Type: Ductal Carcinoma (55)                    | Details      | 0.238  | 0.634  | -2.767 | 0.019   | >1         |
| 13 Ramaswamy_Multi_Cancer | Normal Tissue Type: Bladder (18)                                    | Cancer Type: Bladder Transitional Cell Carcinoma (11) | Details      | 0.879  | 1.123  | -2.81  | 0.013   | 0.72       |
